# Supplementary material for: Liver steatosis is a strong predictor of mortality and cancer in chronic hepatitis B regardless of viral load
Source: PubMed Central journal article supplement — JHEP Rep. 2019 Mar 19;1(1):9–16. doi: 10.1016/j.jhepr.2019.02.002 (PMC7001543; doi:10.1016/j.jhepr.2019.02.002), 2019-03-19
Supplement: mmc3.pdf [file mmc3.pdf]

# **Liver steatosis is a strong predictor of mortality and cancer in chronic hepatitis B regardless of viral load**

Noam Peleg, Assaf Issachar, Orly Sneh Arbib, Michal Cohen-Naftaly, Marius Braun,  
Moshe Leshno, Alon Barscheset, Amir Shlomai

## Table of contents

|               |   |
|---------------|---|
| Fig. S1.....  | 2 |
| Table S1..... | 3 |
| Table S2..... | 4 |
| Table S3..... | 5 |
| Table S4..... | 6 |
| Table S5..... | 6 |
| Table S6..... | 6 |
| Table S7..... | 7 |

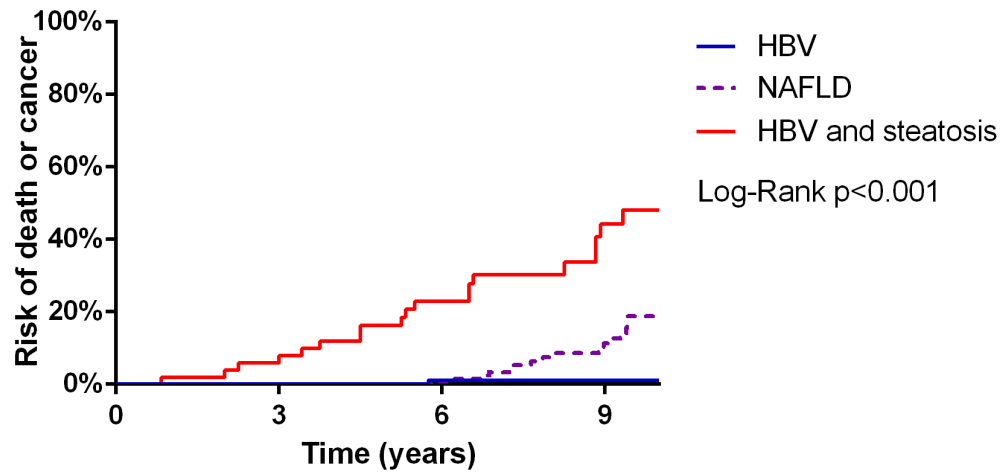

| No. at risk:      | Time (years) |     |     |    |
|-------------------|--------------|-----|-----|----|
|                   | 0            | 3   | 6   | 9  |
| HBV               | 117          | 106 | 86  | 49 |
| NAFLD             | 153          | 153 | 125 | 64 |
| HBV and steatosis | 53           | 47  | 33  | 16 |

**Fig S1. Cumulative rates of mortality and cancer (primary composite outcome) according to the status of liver steatosis in patients with CHB compared to historic cohort of patients with NAFLD (HBV-hepatitis B virus, CHB-chronic hepatitis B, NAFLD-nonalcoholic fatty liver disease).**

**Table S1.** Factors associated with composite outcome of mortality and cancer in CHB patients: univariate analysis

| Variable                 | p value |
|--------------------------|---------|
| Gender–male              | 0.461   |
| Age                      | <0.001  |
| BMI                      | 0.382   |
| Positive HTN diagnosis   | <0.001  |
| Positive DM2 diagnosis   | <0.001  |
| Hemoglobin A1C           | <0.001  |
| Total cholesterol        | 0.017   |
| Triglycerides            | 0.319   |
| Creatinine               | 0.304   |
| Hemoglobin               | 0.010   |
| Platelets                | 0.062   |
| INR                      | 0.544   |
| Albumin                  | <0.001  |
| Bilirubin                | 0.547   |
| Alpha feto protein       | <0.001  |
| AST                      | 0.018   |
| ALT                      | 0.333   |
| ALKP                     | <0.001  |
| GGT                      | <0.001  |
| HBeAg positivity         | 0.370   |
| HDV Antibody positivity  | 0.092   |
| Longer HBV duration      | <0.001  |
| Baseline liver steatosis | <0.001  |
| HBV VL > 2000 IU/ml      | 0.001   |
| APRI score               | <0.001  |
| FIB-4 score              | <0.001  |

HTN = hypertension, DM2 = type 2 diabetes mellitus, BMI = Body mass index, APRI = AST to Platelets ratio index, FIB4 = fibrosis 4 score, HBV DNA lower limit of detection 1.3 log IU/ml (20 IU/ml)

**Table S2A.** Major clinical outcomes of study population during the follow-up period according to advanced fibrosis in patients who underwent liver biopsy

|                                                                  | <b>Advanced fibrosis</b><br>(N = 27) | <b>No advanced fibrosis</b><br>(N = 143) | <b>P Value</b> |
|------------------------------------------------------------------|--------------------------------------|------------------------------------------|----------------|
| <b>Length of follow up (months) (range)</b>                      | 8.09 (0.95 – 14.04)                  | 7.94 (0.94 – 14.04)                      | 0.822          |
| <b>Composite outcome of all-cause mortality and cancer % (N)</b> | 29.62% (8)                           | 10.48% (15)                              | 0.010          |
| <b>All-cause mortality % (N)</b>                                 | 18.51% (5)                           | 7.69% (11)                               | 0.084          |
| <b>Hepatocellular carcinoma % (N)</b>                            | 7.41% (2)                            | 4.19% (6)                                | 0.477          |
| <b>Extra-hepatic malignancies % (N)</b>                          | 11.11% (3)                           | 4.19% (6)                                | 0.141          |

**Table S2B.** Major clinical outcomes of study population during the follow-up period according to APRI score in patients that underwent liver biopsy

|                                                                  | <b>APRI &gt; 1.5</b><br>(N = 16) | <b>APRI &lt; 1.5</b><br>(N = 154) | <b>P Value</b> |
|------------------------------------------------------------------|----------------------------------|-----------------------------------|----------------|
| <b>Length of follow up (years) (range)</b>                       | 8.13 (0.95 – 14.04)              | 7.40 (1.01 – 12.01)               | 0.353          |
| <b>Composite outcome of all-cause mortality and cancer % (N)</b> | 31.25% (5)                       | 11.68% (18)                       | 0.033          |
| <b>All-cause mortality % (N)</b>                                 | 25% (4)                          | 7.79% (12)                        | 0.041          |
| <b>Hepatocellular carcinoma % (N)</b>                            | 18.75% (3)                       | 3.24% (5)                         | 0.010          |
| <b>Extra-hepatic malignancies % (N)</b>                          | 0% (0)                           | 5.84% (9)                         | 0.323          |

**Table S2C.** Major clinical outcomes of study population during the follow-up period according to FIB-4 score in patients that underwent liver biopsy

|                                                                  | <b>FIB-4 &gt; 2.67</b> | <b>FIB-4 &lt; 2.67</b> | <b>P Value</b> |
|------------------------------------------------------------------|------------------------|------------------------|----------------|
|                                                                  | <b>(N = 18)</b>        | <b>(N = 152)</b>       |                |
| <b>Length of follow up (years) (range)</b>                       | 8.10 (0.95 – 14.04)    | 7.78 (1.01 – 12.08)    | 0.671          |
| <b>Composite outcome of all-cause mortality and cancer % (N)</b> | 38.88% (7)             | 10.52% (16)            | 0.001          |
| <b>All-cause mortality % (N)</b>                                 | 33.33% (6)             | 6.57% (10)             | 0.010          |
| <b>Hepatocellular carcinoma % (N)</b>                            | 16.66% (3)             | 3.28% (5)              | 0.010          |
| <b>Extra-hepatic malignancies % (N)</b>                          | 0% (0)                 | 5.92% (9)              | 0.279          |

**Table S3.** Major clinical outcomes during the follow-up period according to baseline liver steatosis status for patients that were treated with anti-viral therapy during follow-up

|                                                                  | <b>Liver steatosis</b> | <b>No liver steatosis</b> | <b>P Value</b> |
|------------------------------------------------------------------|------------------------|---------------------------|----------------|
|                                                                  | <b>(N =71)</b>         | <b>(N =138)</b>           |                |
| <b>Length of follow up (months) (range)</b>                      | 91.21 (3.4 – 168.5)    | 82.08 (3.4 – 166.6)       | 0.090          |
| <b>Composite outcome of all-cause mortality and cancer % (N)</b> | 36.61% (26)            | 6.52% (9)                 | <0.001         |
| <b>All-cause mortality % (N)</b>                                 | 21.12% (15)            | 2.17% (3)                 | <0.001         |
| <b>Malignancy (all types) % (N)</b>                              | 29.57% (21)            | 4.34% (6)                 | <0.001         |
| <b>Hepatocellular carcinoma % (N)</b>                            | 16.90% (12)            | 2.89% (4)                 | <0.001         |
| <b>Extra-hepatic malignancies % (N)</b>                          | 12.67% (9)             | 1.45% (2)                 | 0.001          |

**Table S4.** Multivariate analysis: Predictors of the composite endpoint of all-cause mortality and cancer

|                                         | <b>HR</b> | <b>95% CI</b> | <b>p value</b> |
|-----------------------------------------|-----------|---------------|----------------|
| <b>Baseline liver steatosis</b>         | 4.96      | 1.84 – 13.33  | 0.002          |
| <b>HBV VL &gt; 2000 IU/ml</b>           | 1.33      | 0.72 – 3.42   | 0.541          |
| <b>Initiation of anti-viral therapy</b> | 1.91      | 0.95 – 3.78   | 0.063          |
| <b>Age</b>                              | 1.03      | 1.01 – 1.05   | 0.003          |
| <b>Albumin</b>                          | 0.21      | 0.09 – 0.43   | 0.010          |
| <b>BMI</b>                              | 0.97      | 0.91 – 1.04   | 0.397          |
| <b>Type 2 DM</b>                        | 1.05      | 0.64 – 2.03   | 0.881          |

DM – Diabetes mellitus, VL-viral load, HBV DNA lower limit of detection 1.3 log IU/ml (20 IU/ml)

**Table S5.** Multivariate analysis: Predictors of the composite endpoint of all-cause mortality and cancer

|                                 | <b>HR</b> | <b>95% CI</b> | <b>p value</b> |
|---------------------------------|-----------|---------------|----------------|
| <b>Baseline liver steatosis</b> | 4.44      | 1.72 – 11.45  | 0.001          |
| <b>HBV VL &gt; 2000 IU/ml</b>   | 1.44      | 0.57 – 3.61   | 0.434          |
| <b>APRI score</b>               | 0.79      | 0.58 – 1.08   | 0.143          |
| <b>FIB-4 score</b>              | 1.24      | 1.09 – 1.41   | 0.010          |
| <b>Albumin</b>                  | 0.35      | 0.17 – 0.71   | 0.010          |
| <b>BMI</b>                      | 1.22      | 0.69 – 3.31   | 0.454          |
| <b>Type 2 DM</b>                | 1.34      | 0.71 – 2.53   | 0.361          |

DM – Diabetes mellitus, VL-viral load, HBV DNA lower limit of detection 1.3 log IU/ml (20 IU/ml)

**Table S6.** Multivariate analysis: Predictors of the composite endpoint of all-cause mortality and HCC

|                                 | <b>HR</b> | <b>95% CI</b> | <b>p value</b> |
|---------------------------------|-----------|---------------|----------------|
| <b>Baseline liver steatosis</b> | 4.29      | 1.18 – 15.61  | 0.029          |
| <b>HBV VL &gt; 2000 IU/ml</b>   | 1.77      | 0.53 – 5.87   | 0.349          |
| <b>Alpha feto protein</b>       | 1.03      | 1.02 – 1.04   | <0.001         |
| <b>Type 2 DM</b>                | 2.56      | 1.22 – 5.74   | 0.013          |
| <b>BMI</b>                      | 0.94      | 0.85 – 1.03   | 0.158          |

DM – Diabetes mellitus, VL-viral load, HBV DNA lower limit of detection 1.3 log IU/ml (20 IU/ml)

**Table S7.** Predictors of the composite endpoint of all-cause mortality and cancer in patients with NAFLD and CHB: univariate and multivariate analysis

|                               | Univariate       |              | Multivariate        |                  |
|-------------------------------|------------------|--------------|---------------------|------------------|
|                               | p value          | HR           | 95% CI              | p value          |
| <b>CHB and LS*</b>            | <b>&lt;0.001</b> | <b>21.15</b> | <b>4.90 – 90.09</b> | <b>&lt;0.001</b> |
| <b>NAFLD*</b>                 | <b>&lt;0.001</b> | <b>4.08</b>  | <b>0.92 – 18.08</b> | <b>0.071</b>     |
| <b>Gender–male</b>            | 0.382            |              |                     |                  |
| <b>Age (per year)</b>         | <b>&lt;0.001</b> | <b>1.07</b>  | <b>1.05 – 1.11</b>  | <b>&lt;0.001</b> |
| <b>BMI</b>                    | 0.022            |              |                     |                  |
| <b>Positive HTN diagnosis</b> | <0.001           |              |                     |                  |
| <b>Positive DM2 diagnosis</b> | 0.074            |              |                     |                  |
| <b>Hemoglobin A1C</b>         | 0.012            |              |                     |                  |
| <b>Total cholesterol</b>      | 0.943            |              |                     |                  |
| <b>Triglycerides</b>          | 0.268            |              |                     |                  |
| <b>Creatinine</b>             | 0.559            |              |                     |                  |
| <b>Platelets</b>              | 0.050            |              |                     |                  |
| <b>INR</b>                    | 0.178            |              |                     |                  |
| <b>Albumin</b>                | 0.010            |              |                     |                  |
| <b>Bilirubin</b>              | 0.641            |              |                     |                  |
| <b>Alpha feto protein</b>     | 0.031            |              |                     |                  |
| <b>AST</b>                    | 0.051            |              |                     |                  |
| <b>ALT</b>                    | 0.949            |              |                     |                  |
| <b>Alkaline phosphatase</b>   | 0.451            |              |                     |                  |
| <b>GGT</b>                    | 0.124            |              |                     |                  |

\*Compared to CHB without liver steatosis

CHB – chronic hepatitis B, NAFLD – nonalcoholic fatty liver disease, HTN - hypertension, DM2 - type 2 diabetes mellitus, BMI = Body mass index
